# Supplementary material for: Saccharin guanidination via facile three-component “two saccharins-one dialkylcyanamide” integration
Source: Royal Society of Chemistry journal article supplement (doi:10.1039/c9nj02656h), 2019-01-01
Supplement: c9nj02656h1.pdf [file c9nj02656h1.pdf]

## **Electronic Supplementary Information**

### **Saccharin Guanidination via Facile Three-Component "Two**

### **Saccharins–One Dialkylcyanamide" Integration**

Alexey Yu. Dubovtsev, Daniil M. Ivanov, Uladzislava Dabranskaya, Nadezhda A. Bokach,\* and  
Vadim Yu. Kukushkin\*

*Saint Petersburg State University, Universitetskaya Nab. 7/9, 199034 Saint Petersburg, Russian  
Federation*

## Table of Contents

|                                   |    |
|-----------------------------------|----|
| EXPERIMENTAL SECTION .....        | 3  |
| SCHEME S1 .....                   | 7  |
| X-RAY DIFFRACTION STUDIES .....   | 8  |
| EXPERIMENTAL SPECTRA OF 1-5 ..... | 14 |

## Experimental section

**1. Materials and Instruments.** Saccharin, disubstituted cyanamides, and organic solvents were obtained from commercial sources (Acros, Sigma–Aldrich) and used as received. Melting points were measured on a Stuart SMP30 apparatus in capillaries and are not corrected. Electrospray ionization mass spectra were obtained on a Bruker micrOTOF spectrometer equipped with an electrospray ionization (ESI) source. The instrument was operated both in negative and in positive ion mode using an  $m/z$  range of 50–3000. The nebulizer gas flow was 0.4 bar, and the drying gas flow was 4.0 L/min. For ESI-MS, the clusters were dissolved in MeOH. In the isotopic pattern, the most intensive peak is reported. Infrared spectra (3600–500  $\text{cm}^{-1}$ ) were recorded on a Shimadzu IR Prestige-21 instrument in KBr pellets.  $^1\text{H}$ ,  $^{13}\text{C}\{^1\text{H}\}$  NMR spectra were measured on a Bruker Avance 400 in  $\text{dms}\text{-}d_6$  at ambient temperature; the residual solvent signal was used as the internal standard.  $^{13}\text{C}$  CP/MAS NMR spectrum for **5** was measured on a Bruker WB Avance III 400 at ambient temperature.

**2. X-ray structure determinations.** Crystals of **1**•NCNMe<sub>2</sub>, **2**•NCNEt<sub>2</sub>, and **4**•2NCNC<sub>5</sub>H<sub>10</sub> were obtained directly from the reaction mixtures upon their evaporation almost to dryness in an open vial at RT for approx. 2 d. These species were obtained as large transparent colorless crystals under a yellow solution (ca. 0.5 mL). All X-ray diffraction (XRD) experiments were performed at 100 K. For **1**•NCNMe<sub>2</sub> and **4**•2NCNC<sub>5</sub>H<sub>10</sub>, XRD experiments were carried out using SuperNova, Dual, Cu at zero, Atlas diffractometer with monochromated Cu K $\alpha$  radiation ( $\lambda = 1.54184$ ). For **2**•NCNEt<sub>2</sub>, XRD experiments was carried out using Xcalibur, Eos diffractometer with monochromated Mo K $\alpha$  radiation ( $\lambda = 0.7107$ ). Using Olex2,<sup>1</sup> the structures were solved with SHELXT<sup>2</sup> structure solution program and refined with SHELXL<sup>3</sup> refinement. For **2**•NCNEt<sub>2</sub>, the second crystallographically independent NCNEt<sub>2</sub> molecule was deleted by SQUEEZE in Platon program due to disorder. CCDC numbers 1917245, 1917248, and 1917249 contain the supplementary crystallographic data for this paper. These data can be obtained free of

charge from the Cambridge Crystallographic Data Centre via  
[www.ccdc.cam.ac.uk/data\\_request/cif](http://www.ccdc.cam.ac.uk/data_request/cif).

**Table S1.** Crystallographic parameters for structures **1**•NCNMe<sub>2</sub>, **2**•NCNEt<sub>2</sub>, and **4**•2NCNC<sub>5</sub>H<sub>10</sub>.

| Identification code                         | <b>1</b> •NCNMe <sub>2</sub>                                                 | <b>2</b> •NCNEt <sub>2</sub>                                                   | <b>4</b> •2NCNC <sub>5</sub> H <sub>10</sub>                                 |
|---------------------------------------------|------------------------------------------------------------------------------|--------------------------------------------------------------------------------|------------------------------------------------------------------------------|
| CCDC number                                 | 1917245                                                                      | 1917248                                                                        | 1917249                                                                      |
| Empirical formula                           | C <sub>20</sub> H <sub>22</sub> N <sub>6</sub> O <sub>6</sub> S <sub>2</sub> | C <sub>43</sub> H <sub>50</sub> N <sub>10</sub> O <sub>12</sub> S <sub>4</sub> | C <sub>32</sub> H <sub>40</sub> N <sub>8</sub> O <sub>6</sub> S <sub>2</sub> |
| Formula weight                              | 506.55                                                                       | 1027.17                                                                        | 696.84                                                                       |
| Temperature/K                               | 100(2)                                                                       | 100(2)                                                                         | 100(2)                                                                       |
| Crystal system                              | monoclinic                                                                   | triclinic                                                                      | triclinic                                                                    |
| Space group                                 | P2 <sub>1</sub> /c                                                           | P-1                                                                            | P-1                                                                          |
| a/Å                                         | 7.8690(5)                                                                    | 8.0019(4)                                                                      | 8.4094(5)                                                                    |
| b/Å                                         | 18.8106(12)                                                                  | 15.8441(8)                                                                     | 13.2878(8)                                                                   |
| c/Å                                         | 15.5694(12)                                                                  | 20.2939(9)                                                                     | 16.0580(6)                                                                   |
| α/°                                         | 90                                                                           | 84.309(4)                                                                      | 89.298(4)                                                                    |
| β/°                                         | 99.693(7)                                                                    | 84.453(4)                                                                      | 78.292(4)                                                                    |
| γ/°                                         | 90                                                                           | 80.817(4)                                                                      | 72.505(5)                                                                    |
| Volume/Å <sup>3</sup>                       | 2271.7(3)                                                                    | 2518.9(2)                                                                      | 1673.47(16)                                                                  |
| Z                                           | 4                                                                            | 2                                                                              | 2                                                                            |
| ρ <sub>calc</sub> /g/cm <sup>3</sup>        | 1.481                                                                        | 1.354                                                                          | 1.383                                                                        |
| μ/mm <sup>-1</sup>                          | 2.573                                                                        | 0.257                                                                          | 1.918                                                                        |
| F(000)                                      | 1056.0                                                                       | 1076.0                                                                         | 736.0                                                                        |
| Crystal size/mm <sup>3</sup>                | 0.19 × 0.17 × 0.14                                                           | 0.20 × 0.18 × 0.15                                                             | 0.15 × 0.14 × 0.10                                                           |
| Radiation                                   | Cu Kα<br>(λ = 1.54184)                                                       | Mo Kα<br>(λ = 0.7107)                                                          | CuKα<br>(λ = 1.54184)                                                        |
| 2θ range for data collection/°              | 7.434 to 152.518                                                             | 5.4 to 62.31                                                                   | 6.984 to 152.324                                                             |
| Index ranges                                | -9 ≤ h ≤ 9,<br>-23 ≤ k ≤ 22,<br>-19 ≤ l ≤ 13                                 | -10 ≤ h ≤ 11,<br>-21 ≤ k ≤ 21,<br>-28 ≤ l ≤ 29                                 | -10 ≤ h ≤ 9,<br>-16 ≤ k ≤ 14,<br>-17 ≤ l ≤ 20                                |
| Reflections collected                       | 8462                                                                         | 47338                                                                          | 14698                                                                        |
| Independent reflections                     | 4484<br>[R <sub>int</sub> = 0.0436,<br>R <sub>sigma</sub> = 0.0531]          | 14394<br>[R <sub>int</sub> = 0.0355,<br>R <sub>sigma</sub> = 0.0387]           | 6847<br>[R <sub>int</sub> = 0.0440,<br>R <sub>sigma</sub> = 0.0521]          |
| Data/restraints/parameters                  | 4484/0/311                                                                   | 14394/2/638                                                                    | 6847/8/451                                                                   |
| Goodness-of-fit on F <sup>2</sup>           | 1.040                                                                        | 1.028                                                                          | 1.028                                                                        |
| Final R indexes [I ≥ 2σ (I)]                | R <sub>1</sub> = 0.0437,<br>wR <sub>2</sub> = 0.1054                         | R <sub>1</sub> = 0.0489,<br>wR <sub>2</sub> = 0.1143                           | R <sub>1</sub> = 0.0455,<br>wR <sub>2</sub> = 0.1170                         |
| Final R indexes [all data]                  | R <sub>1</sub> = 0.0560,<br>wR <sub>2</sub> = 0.1154                         | R <sub>1</sub> = 0.0643,<br>wR <sub>2</sub> = 0.1218                           | R <sub>1</sub> = 0.0559,<br>wR <sub>2</sub> = 0.1259                         |
| Largest diff. peak/hole / e·Å <sup>-3</sup> | 0.36/-0.49                                                                   | 0.61/-0.41                                                                     | 0.54/-0.77                                                                   |

### 3. Synthetic work

*Synthesis of 1–5.* Saccharin (91.6 mg, 0.5 mmol) was dissolved on stirring in the corresponding cyanamide (0.5 mL) at 60 °C. After 30–60 min, a colorless precipitate was formed and the reaction mixture was then stirred for 2 h at 60 °C. After cooling the reaction mixture to RT, the colorless precipitate was filtered off, washed twice with ethyl acetate (two 3-mL portions) and dried *in vacuo* (4 mbar) on a boiling water bath for 5 h.

1. Yield 81% (88.4 mg). mp 240–241 °C. <sup>1</sup>H NMR,  $\delta$ : 8.92 (br. d,  $J = 6.1$  Hz, 1H, NH), 8.40 (d,  $J = 7.8$  Hz, 1H, Ar), 8.37 (br. d,  $J = 6.6$  Hz, 1H, NH), 8.18–8.12 (m, 1H, Ar), 8.06–8.02 (m, 2H, Ar), 7.81 (d,  $J = 6.4$  Hz, 1H, Ar), 7.63 (td,  $J = 7.6, 1.4$  Hz, 1H, Ar), 7.57 (td,  $J = 7.5, 1.4$  Hz, 1H, Ar), 7.44 (d,  $J = 6.1$  Hz, 1H, Ar), 3.24 (s, 3H, Me), 2.95 (s, 3H, Me); <sup>13</sup>C NMR,  $\delta$ : 158.5, 157.3, 155.8, 144.0, 137.1, 137.0, 135.7, 131.0, 130.0, 126.8, 126.7, 126.2, 125.9, 124.9, 121.7, 40.2, 37.6; HRMS (ESI):  $m/z$  [M + Na]<sup>+</sup> calcd. for C<sub>17</sub>H<sub>16</sub>N<sub>4</sub>NaO<sub>6</sub>S<sub>2</sub><sup>+</sup>: 459.0403; found: 459.0404. IR spectrum in KBr, selected bands, cm<sup>-1</sup>: 1768, s  $\nu$ (C=O), 1674, s and 1646, s  $\nu$ (C=N), 1308, s, 1230, s, and 1193, s  $\nu_{as+s}$ (S=O).

2. Yield 85% (98.7 mg). mp 228–229 °C. <sup>1</sup>H NMR,  $\delta$ : 9.02 (br. d,  $J = 6.2$  Hz, 1H, NH), 8.40 (d,  $J = 7.8$  Hz, 1H, Ar), 8.36 (br. d,  $J = 6.7$  Hz, 1H, NH), 8.18–8.12 (m, 1H, Ar), 8.06–8.01 (m, 2H, Ar), 7.82 (d,  $J = 6.4$  Hz, 1H, Ar), 7.63 (td,  $J = 7.5, 1.3$  Hz, 1H, Ar), 7.56 (td,  $J = 7.5, 1.4$  Hz, 1H, Ar), 7.42 (d,  $J = 6.2$  Hz, 1H, Ar), 3.75–3.68 (m, 1H, CH<sub>2</sub>), 3.56–3.49 (m, 1H, CH<sub>2</sub>), 3.41–3.26 (m, 2H, CH<sub>2</sub>), 1.25 (t,  $J = 7.1$  Hz, 3H, Me), 0.91 (t,  $J = 7.1$  Hz, 3H, Me); <sup>13</sup>C NMR,  $\delta$ : 157.5, 157.3, 155.8, 143.9, 137.11, 137.07, 135.7, 130.9, 129.9, 126.8, 126.4, 126.2, 125.9, 124.9, 121.6, 44.4, 42.3, 12.7, 11.5; HRMS (ESI):  $m/z$  [M + Na]<sup>+</sup> calcd. for C<sub>19</sub>H<sub>20</sub>N<sub>4</sub>NaO<sub>6</sub>S<sub>2</sub><sup>+</sup>: 487.0716; found: 487.0707. IR spectrum in KBr, selected bands, cm<sup>-1</sup>: 1768, s  $\nu$ (C=O), 1670, s and 1642, s  $\nu$ (C=N), 1303, s, 1234, s, and 1185, s  $\nu_{as+s}$ (S=O).

3. Yield 79% (91.3 mg). mp 242–243 °C. <sup>1</sup>H NMR,  $\delta$ : 8.88 (br. s, 1H, NH), 8.40 (d,  $J = 7.8$  Hz, 1H, Ar), 8.26 (br. s, 1H, NH), 8.17–8.13 (m, 1H, Ar), 8.04 (d,  $J = 4.3$  Hz, 2H, Ar), 7.81 (d,  $J = 7.7$  Hz, 1H, Ar), 7.62 (t,  $J = 7.8$  Hz, 1H, Ar), 7.56 (t,  $J = 7.4$  Hz, 1H, Ar), 7.46 (d,  $J = 7.3$

Hz, 1H, Ar), 3.76 (s, 1H, CH<sub>2</sub>), 3.64 (s, 1H, CH<sub>2</sub>), 3.15 (s, 2H, CH<sub>2</sub>), 1.95 (s, 4H, CH<sub>2</sub>); CP/MAS <sup>13</sup>C NMR (10 kHz),  $\delta$ : 157.4, 157.2, 155.3, 142.5, 140.3, 138.5, 134.3, 133.6, 132.1, 130.3, 129.0, 126.2, 123.9 (2C), 120.1, 50.1 (2C), 26.7, 24.5; HRMS (ESI):  $m/z$  [M + Na]<sup>+</sup> calcd. for C<sub>19</sub>H<sub>18</sub>N<sub>4</sub>NaO<sub>6</sub>S<sub>2</sub><sup>+</sup>: 485.0560; found: 485.0557. IR spectrum in KBr, selected bands, cm<sup>-1</sup>: 1769, s  $\nu$ (C=O), 1658, s and 1625, s  $\nu$ (C=N), 1288, s, 1229, s, and 1197, s  $\nu_{as+s}$ (S=O).

4. Yield 91% (108.4 mg). mp 209–210 °C. <sup>1</sup>H NMR,  $\delta$ : 9.01 (br. d,  $J$  = 5.8 Hz, 1H, NH), 8.43 (br. d,  $J$  = 6.3 Hz, 1H, NH), 8.39 (d,  $J$  = 7.7 Hz, 1H, Ar), 8.18–8.12 (m, 1H, Ar), 8.04 (d,  $J$  = 4.2 Hz, 2H, Ar), 7.82 (d,  $J$  = 5.8 Hz, 1H, Ar), 7.64–7.57 (m, 2H, Ar), 7.43 (d,  $J$  = 5.6 Hz, 1H, Ar), 3.76 (s, 1H, CH<sub>2</sub>), 3.69 (s, 1H, CH<sub>2</sub>), 3.40 (s, 2H, CH<sub>2</sub>), 1.64 (s, 5H, CH<sub>2</sub>), 1.38 (s, 1H, CH<sub>2</sub>); <sup>13</sup>C NMR,  $\delta$ : 157.3, 156.7, 155.8, 143.9, 137.1, 137.05, 135.7, 131.0, 129.8, 126.9, 126.8, 126.1, 125.9, 124.9, 121.6, 47.3, 45.9, 25.2, 24.7, 22.7; HRMS (ESI):  $m/z$  [M + Na]<sup>+</sup> calcd. for C<sub>20</sub>H<sub>20</sub>N<sub>4</sub>NaO<sub>6</sub>S<sub>2</sub><sup>+</sup>: 499.0716; found: 499.0712. IR spectrum in KBr, selected bands, cm<sup>-1</sup>: 1763, s  $\nu$ (C=O), 1650, s and 1630, s  $\nu$ (C=N), 1284, s, 1259, s, and 1195, s  $\nu_{as+s}$ (S=O).

5. Yield 65% (77.8 mg). mp 208–209 °C. <sup>1</sup>H NMR,  $\delta$ : 9.17 (br. d,  $J$  = 6.3 Hz, 1H, NH), 8.60 (br. d,  $J$  = 6.9 Hz, 1H, NH), 8.41 (d,  $J$  = 7.8 Hz, 1H, Ar), 8.18–8.11 (m, 1H, Ar), 8.05–7.92 (m, 2H, Ar), 7.85–7.80 (m, 1H, Ar), 7.70–7.59 (m, 2H, Ar), 7.55–7.48 (m, 1H, Ar), 3.88–3.69 (m, 5H, CH<sub>2</sub>), 3.45 (s, 3H, CH<sub>2</sub>); CP/MAS <sup>13</sup>C NMR (10 kHz)  $\delta$ : 157.6, 157.5, 155.8, 143.9, 137.2, 137.0, 135.7, 131.0, 129.9, 127.0, 126.8, 126.0, 125.9, 124.8, 121.7, 65.6, 64.8, 46.2, 45.1; HRMS (ESI):  $m/z$  [M + H]<sup>+</sup> calcd. for C<sub>19</sub>H<sub>19</sub>N<sub>4</sub>O<sub>7</sub>S<sub>2</sub><sup>+</sup>: 479.0690; found: 479.0697. IR spectrum in KBr, selected bands, cm<sup>-1</sup>: 1771, s  $\nu$ (C=O), 1657, s and 1626, s  $\nu$ (C=N), 1285, s, 1231, s, and 1195, s  $\nu_{as+s}$ (S=O).

## Scheme S1

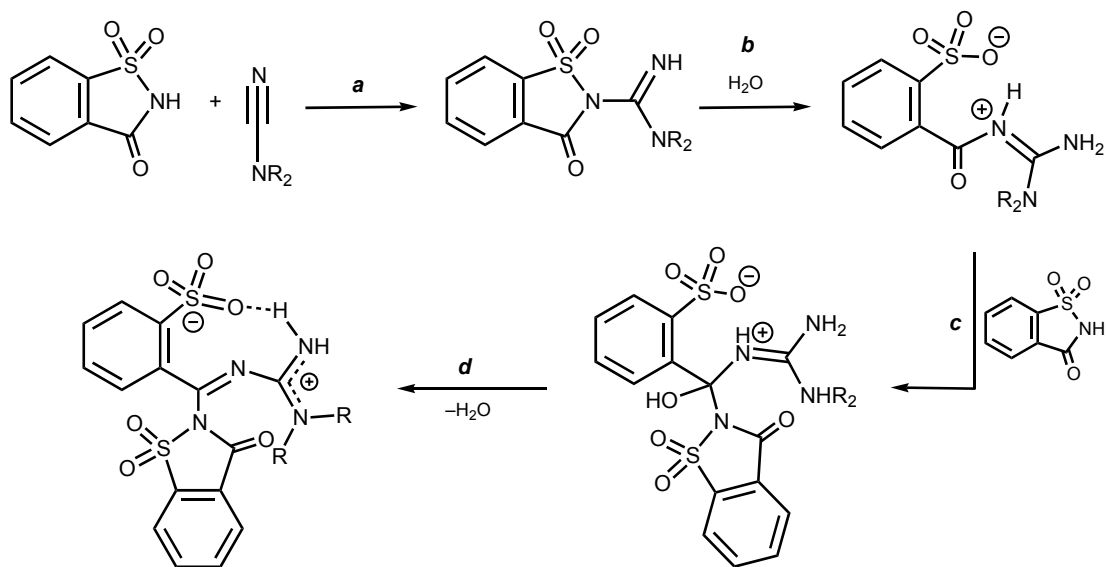

**Scheme S12.** Plausible reaction mechanism of the addition.



## X-ray diffraction studies

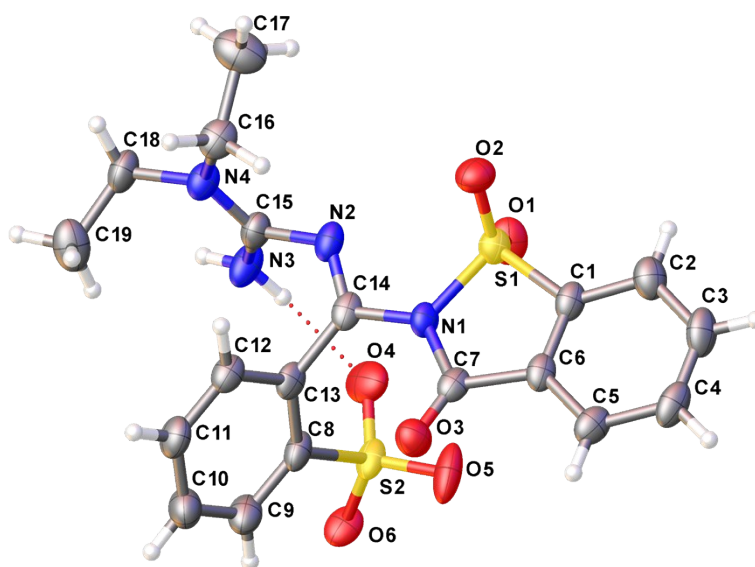

**Figure S1.** The molecular structure of **2** in  $2 \cdot \text{NCNEt}_2$ .

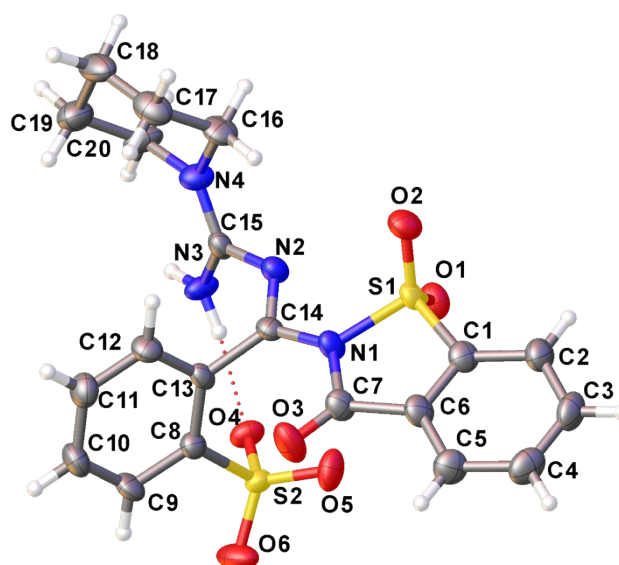

**Figure S2.** The molecular structure of **4** in  $4 \cdot 2\text{NCN}(\text{CH}_2)_5$ .

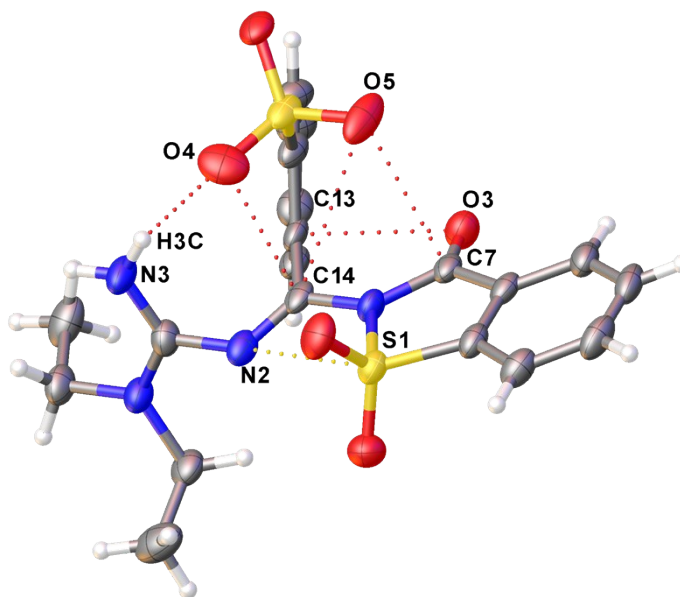

**Figure S3.** Possible intramolecular weak interactions of **2** in  $2 \cdot \text{NCNEt}_2$ .

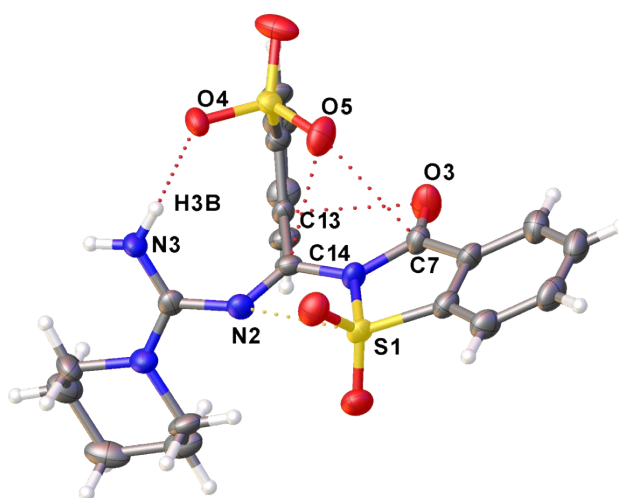

**Figure S4.** Possible intramolecular weak interactions of **4** in  $4 \cdot 2\text{NCN}(\text{CH}_2)_5$ .

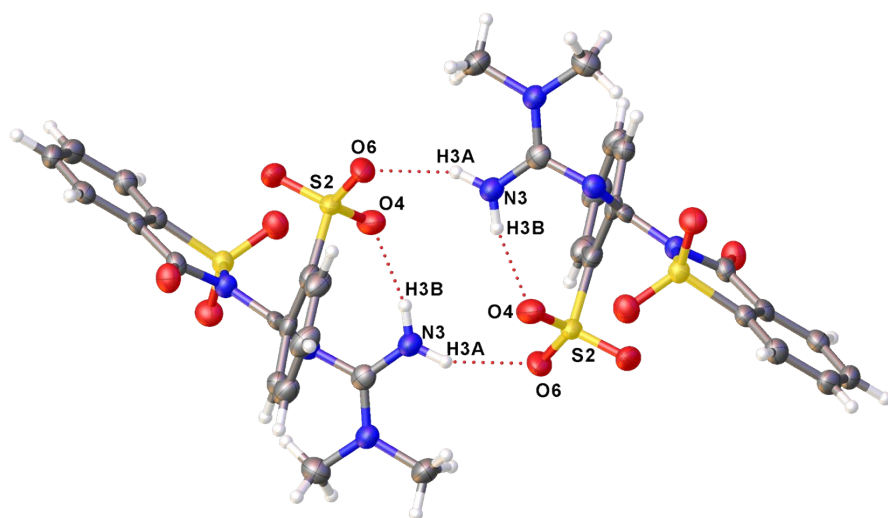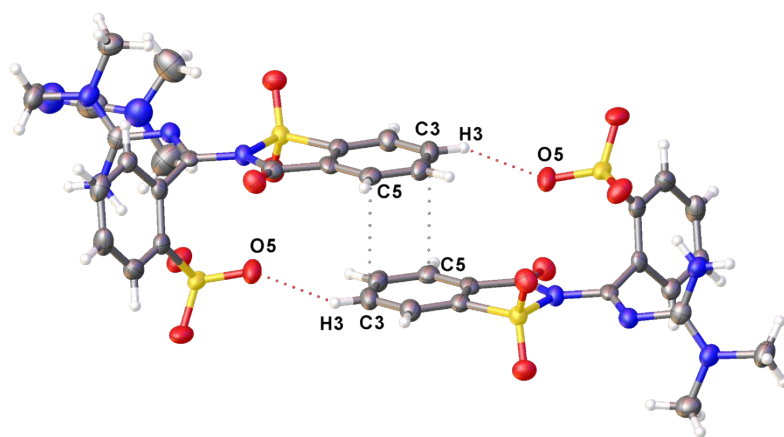

**Figure S5.** Weak intermolecular interactions in crystal structure of **1**•NCNMe<sub>2</sub>.

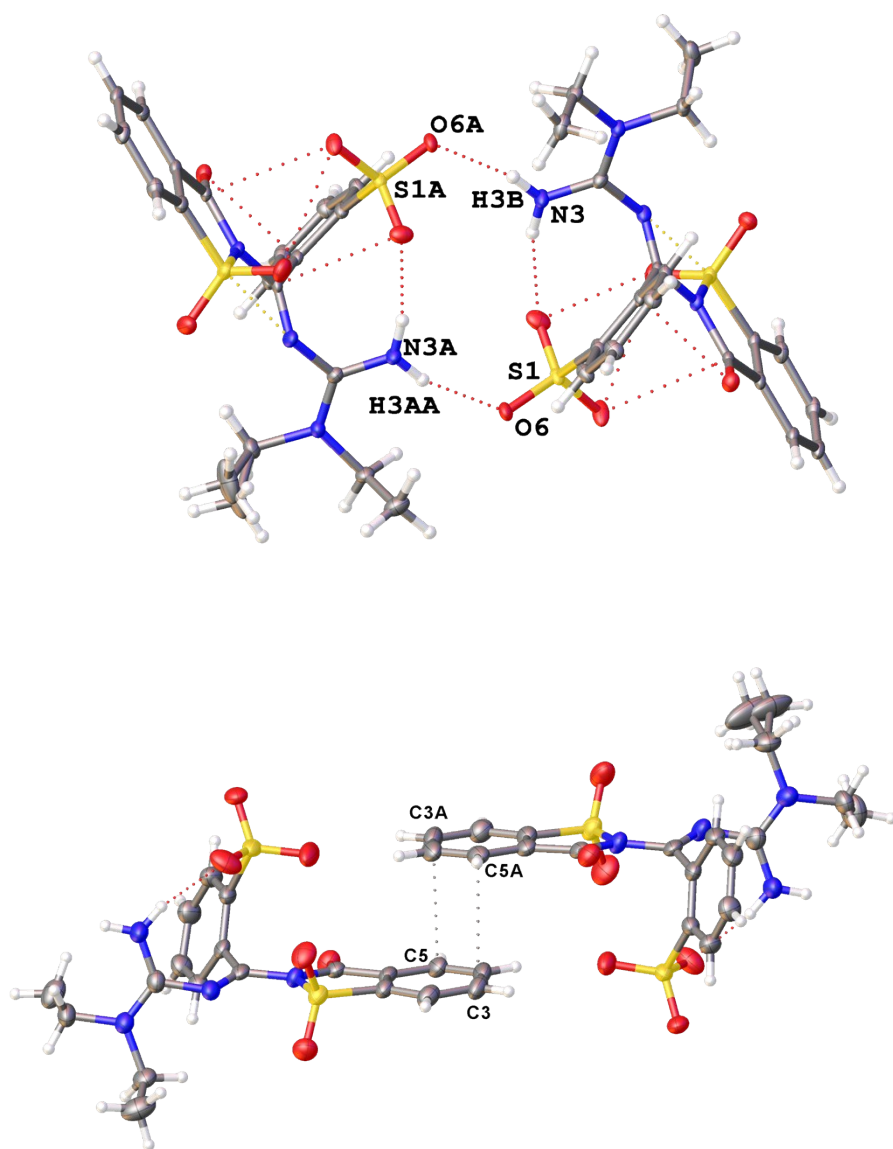

**Figure S6.** Weak intermolecular interactions in crystal structure of 2•NCNEt<sub>2</sub>.

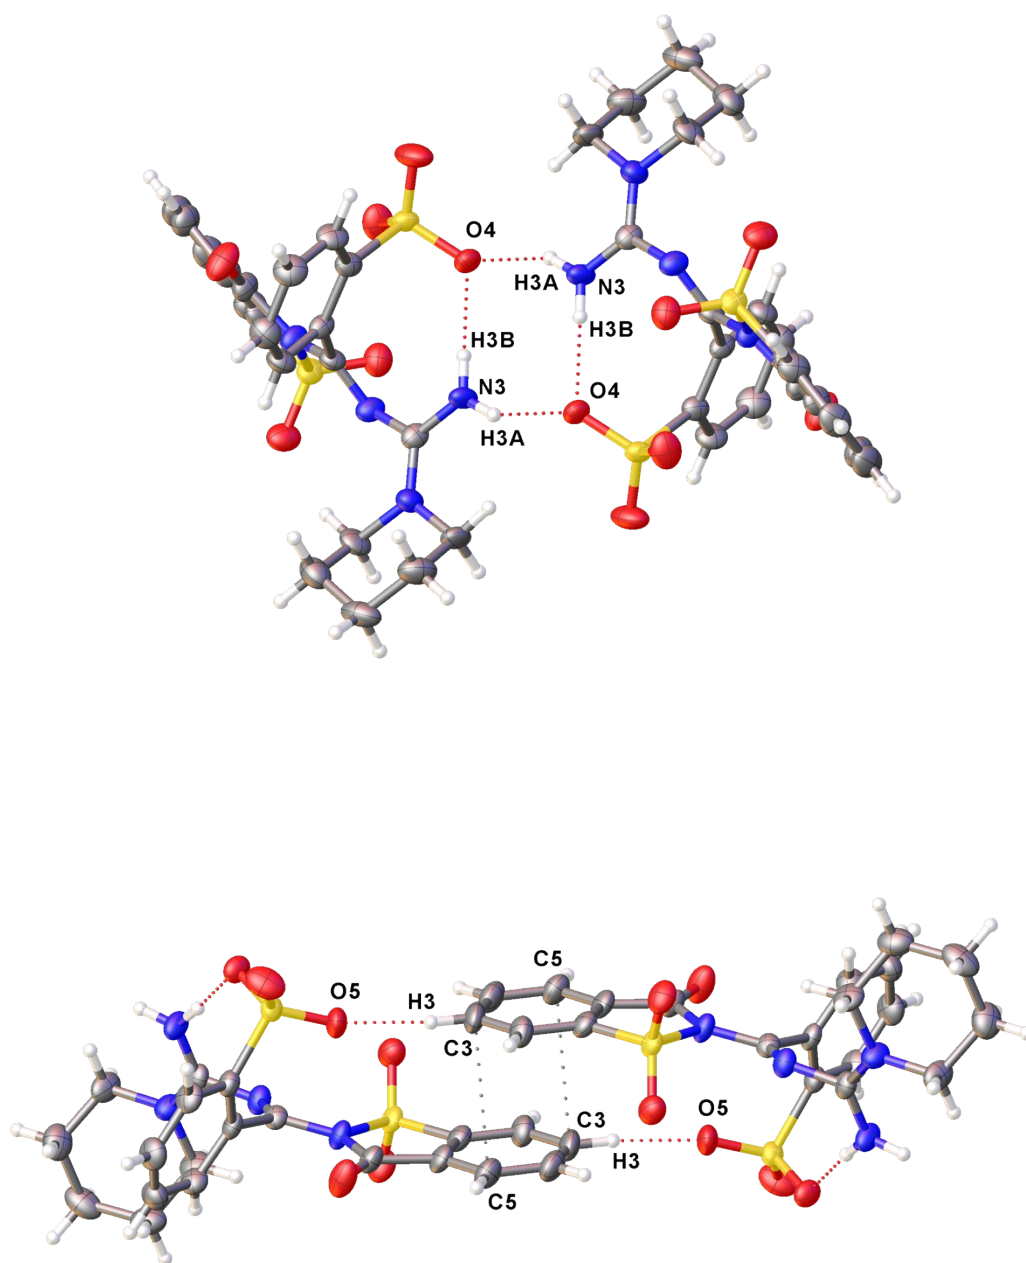

**Figure S7.** Weak intermolecular interactions in crystal structure of  $4 \cdot 2\text{NCN}(\text{CH}_2)_5$ .

**Table S1.** Bond lengths for different types of C–N bonds in adducts.

| Bond   | Order | Bond length (Å)      |                      |                                       |
|--------|-------|----------------------|----------------------|---------------------------------------|
|        |       | 1•NCNMe <sub>2</sub> | 2•NCNEt <sub>2</sub> | 4•2NCN(CH <sub>2</sub> ) <sub>5</sub> |
| C15–N2 | 1     | 1.391(3)             | 1.396(2)             | 1.391(2)                              |
| C15–N3 | 1.5   | 1.319(3)             | 1.322(2)             | 1.316(3)                              |
| C15–N4 | 1.5   | 1.318(3)             | 1.316(2)             | 1.320(2)                              |
| C14–N2 | 2     | 1.279(3)             | 1.282(2)             | 1.278(2)                              |

**Table S2.** The D•••A distances for lp–πh contacts in 1•NCNMe<sub>2</sub>, 2•NCNEt<sub>2</sub>, and 4•2NCN(CH<sub>2</sub>)<sub>5</sub>.

| Product                               | D•••A distance, Å |          |            |          |          |
|---------------------------------------|-------------------|----------|------------|----------|----------|
|                                       | N2•••S1           | O5•••C7  | O3•••C13   | O4•••C14 | O5•••C14 |
| 1•NCNMe <sub>2</sub>                  | 2.8466(17)        | 2.923(3) | 2.797(2)   | 2.977(3) | –        |
| 2•NCNEt <sub>2</sub>                  | 2.8277(13)        | 3.008(2) | 2.7827(18) | 2.905(2) | –        |
|                                       | 2.8444(14)        | 2.980(2) | 2.7618(19) | 3.003(2) | –        |
| 4•2NCN(CH <sub>2</sub> ) <sub>5</sub> | 2.7934(15)        | 2.985(3) | 2.769(2)   | –        | 2.977(3) |

The sum of Bondi vdW radii<sup>4</sup> are  $R_{\text{vdW}}(\text{S}) + R_{\text{vdW}}(\text{N}) = 3.35 \text{ \AA}$  and  $R_{\text{vdW}}(\text{C}) + R_{\text{vdW}}(\text{O}) = 3.22 \text{ \AA}$ .

**Table S3.** Intra- and intermolecular N–H•••O HBs in 1•NCNMe<sub>2</sub>, 2•NCNEt<sub>2</sub>, and 4•2NCN(CH<sub>2</sub>)<sub>5</sub>.

| HB                                        | H•••O distance, Å | N–H•••O distance, Å | N–H•••O angle, ° | Type of contacts |
|-------------------------------------------|-------------------|---------------------|------------------|------------------|
| <b>1•NCNMe<sub>2</sub></b>                |                   |                     |                  |                  |
| N3–H3B•••O4                               | 1.9846(15)        | 2.826(2)            | 165.56(14)       | intramolecular   |
| N3–H3A•••O6                               | 2.0427(16)        | 2.829(2)            | 151.54(13)       | intermolecular   |
| <b>2•NCNEt<sub>2</sub></b>                |                   |                     |                  |                  |
| N3–H3C•••O4                               | 1.9967(12)        | 2.8194(10)          | 159.72(12)       | intramolecular   |
| N3A–H3AB•••O4A                            | 2.0226(15)        | 2.8587(18)          | 165.50(11)       | intramolecular   |
| N3–H3B•••O6A                              | 2.0427(16)        | 2.829(2)            | 164.12(11)       | intermolecular   |
| N3A–H3AA•••O6                             | 2.086(11)         | 2.9153(18)          | 163.2(1)         | intermolecular   |
| <b>4•2NCN(CH<sub>2</sub>)<sub>5</sub></b> |                   |                     |                  |                  |
| N3–H3B•••O4                               | 1.9267(16)        | 2.783(2)            | 173.79(10)       | intramolecular   |
| N3–H3A•••O4                               | 2.0039 (13)       | 2.806(2)            | 154.75(14)       | intermolecular   |

## Experimental spectra of 1-5

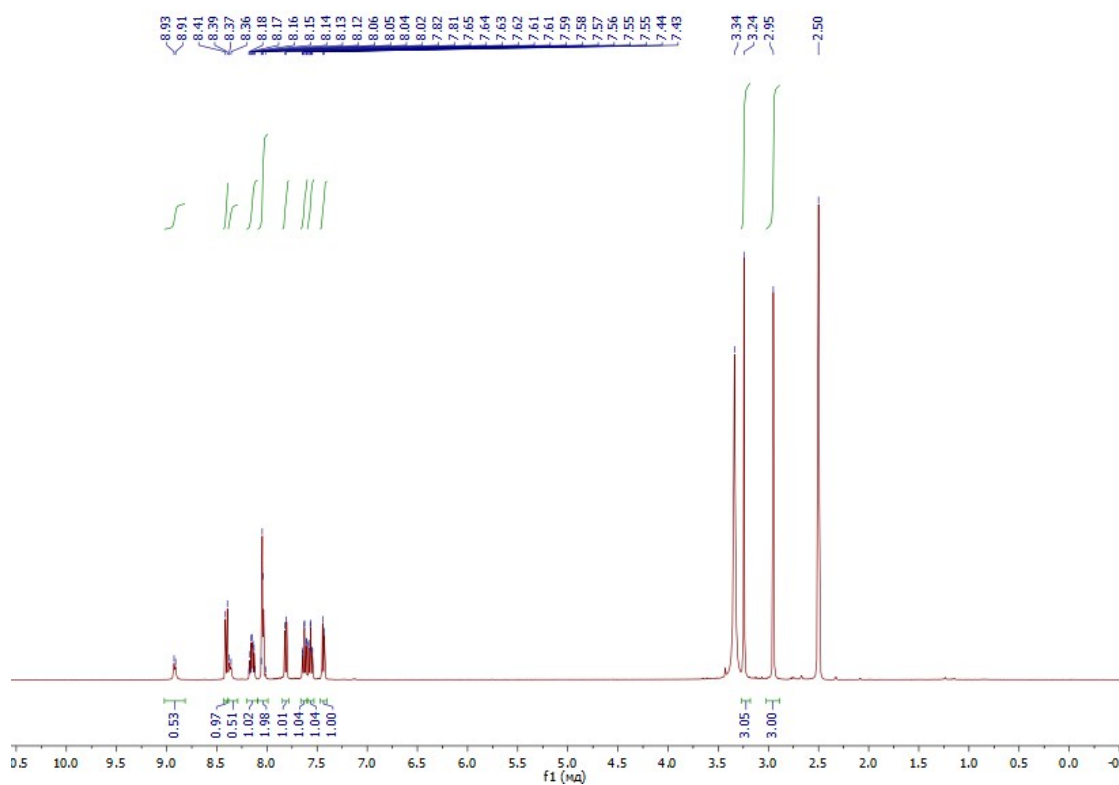

**Figure S8.** <sup>1</sup>H NMR spectrum of **1** in dms0-d<sub>6</sub>.

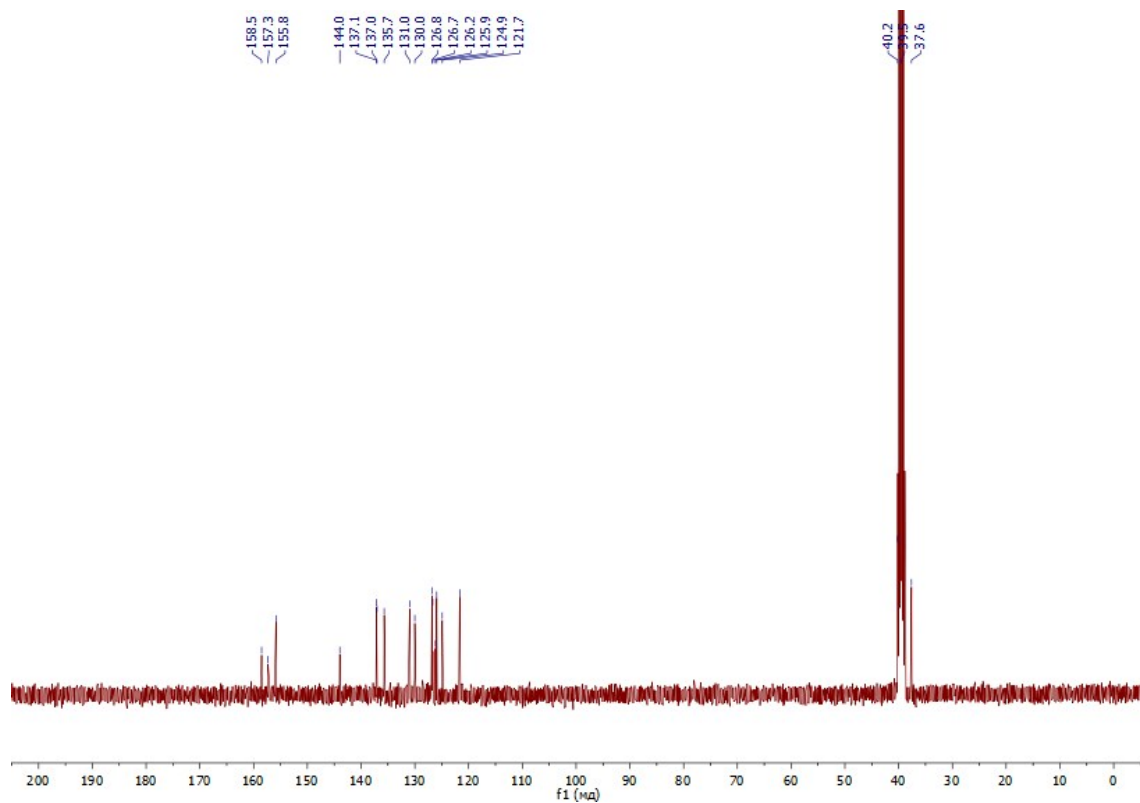

**Figure S9.** <sup>13</sup>C NMR spectrum of **1** in dms0-d<sub>6</sub>.

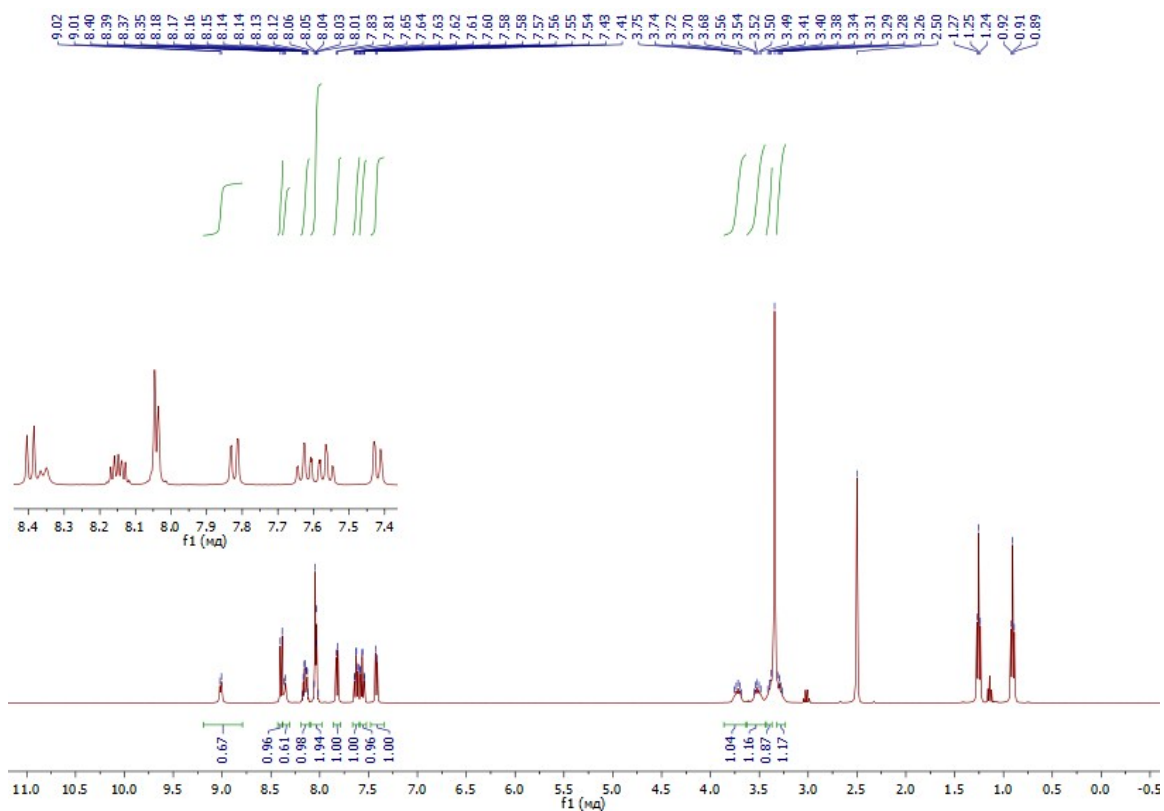

Figure S10.  $^1\text{H}$  NMR spectrum of **2** in  $\text{dms0-d}_6$ .

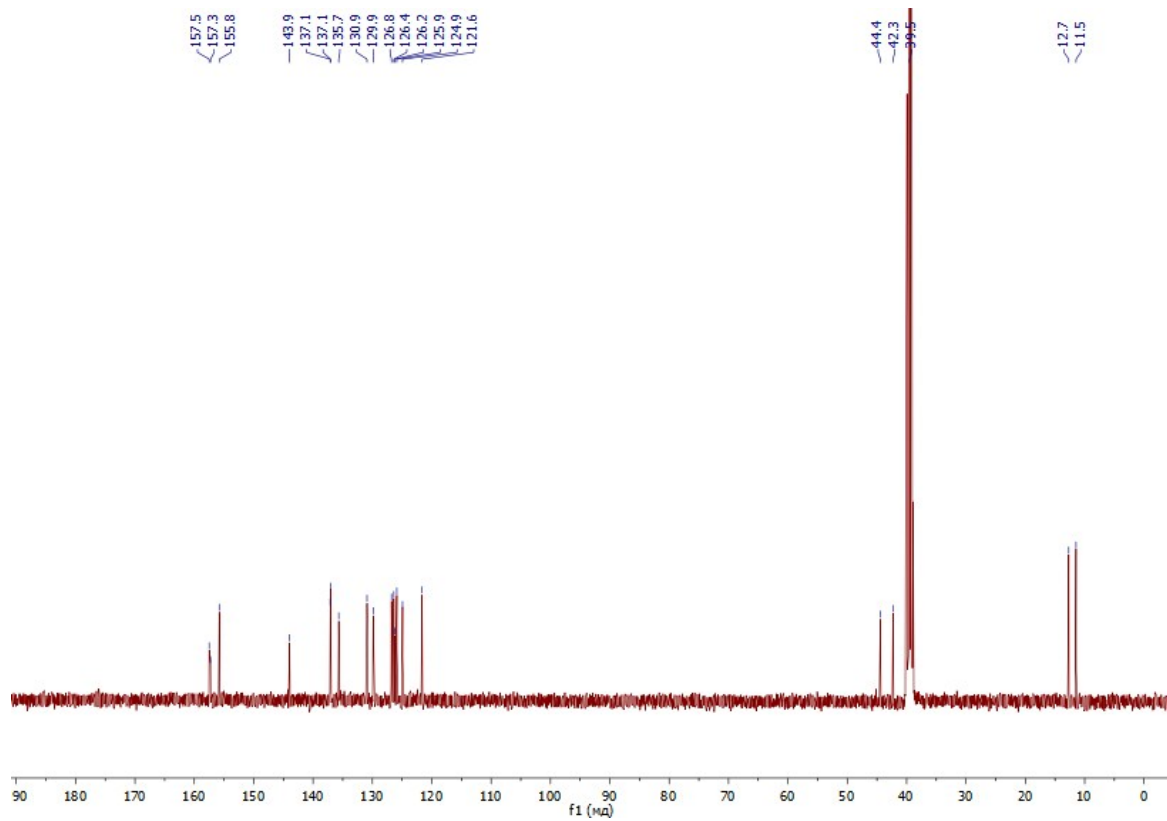

Figure S11.  $^{13}\text{C}$  NMR spectrum of **2** in  $\text{dms0-d}_6$ .



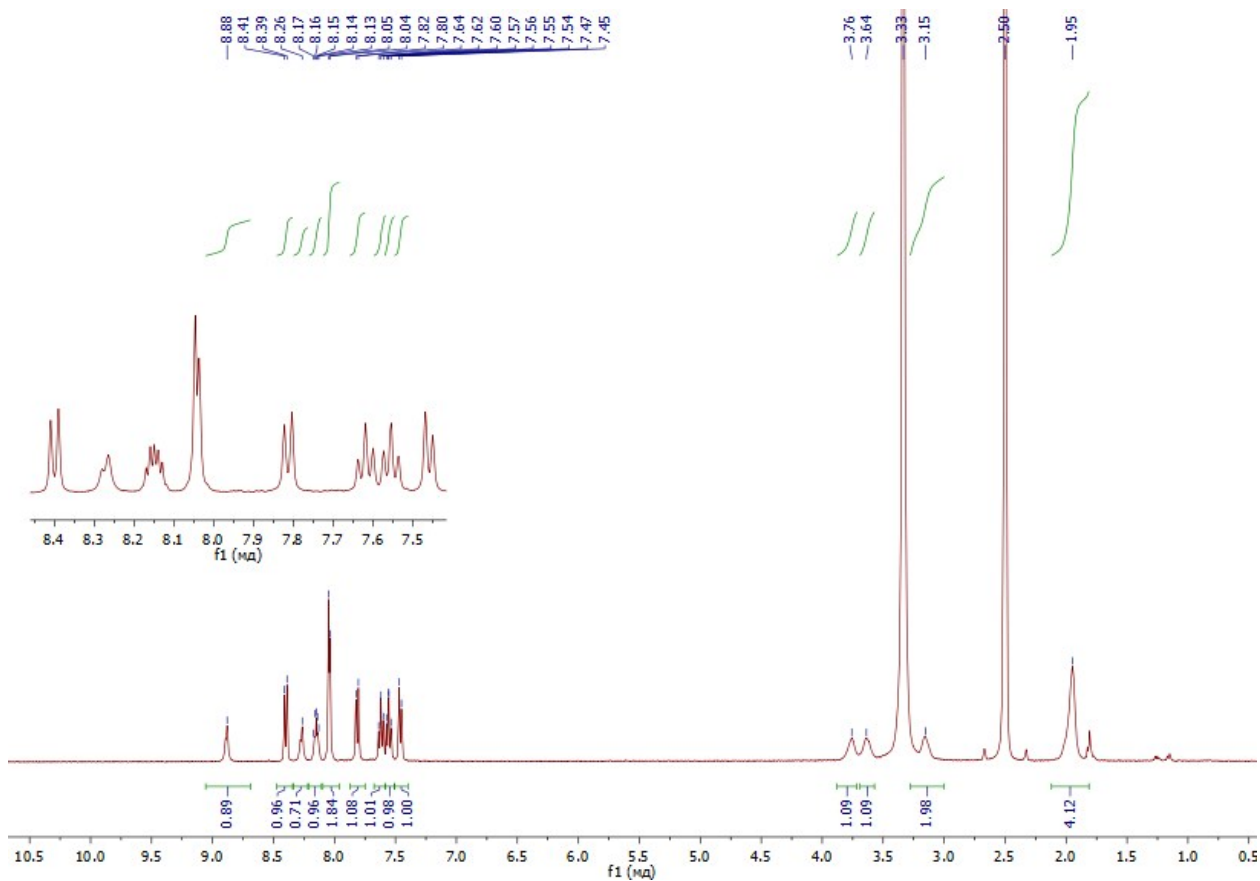

**Figure S12.** <sup>1</sup>H NMR spectrum of **3** in dms0-d<sub>6</sub>.

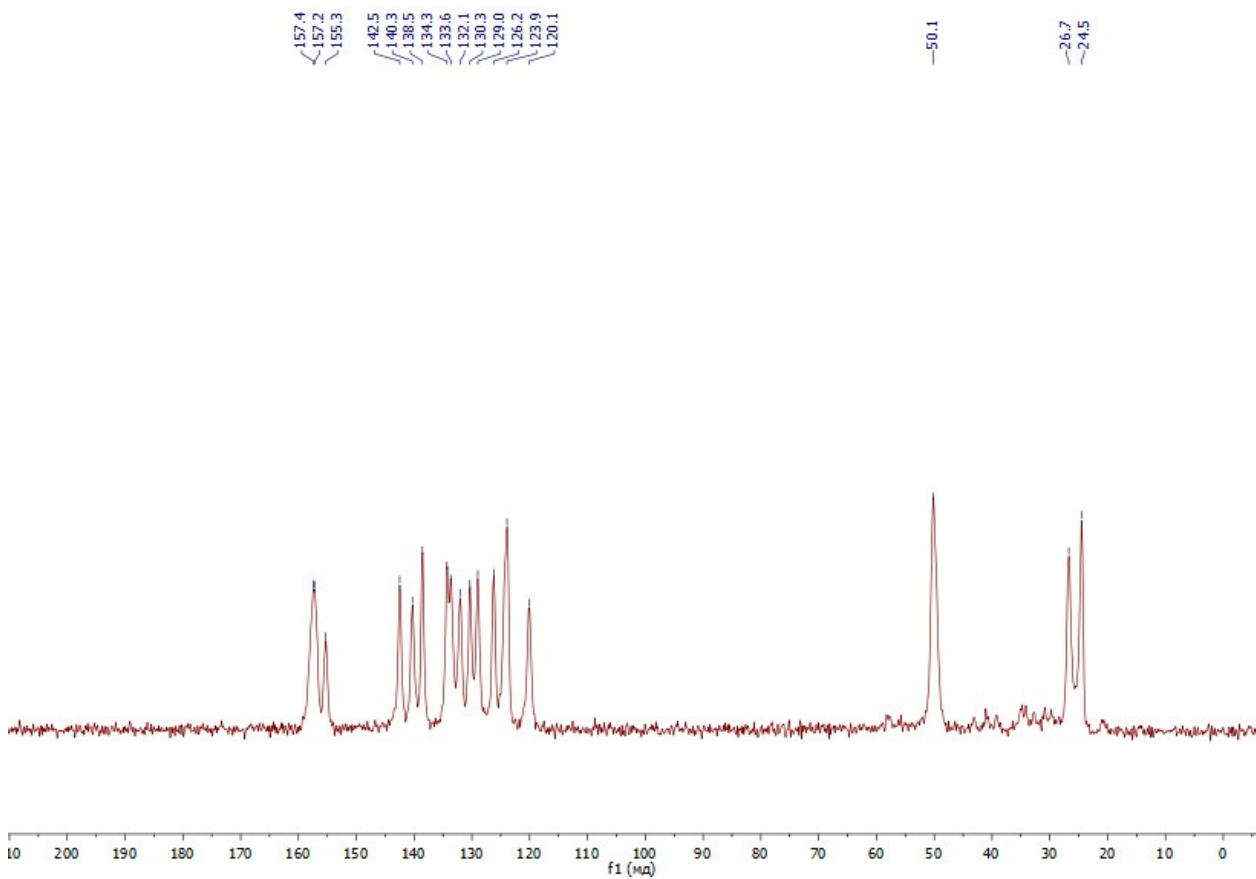

Figure S13. CP/MAS  $^{13}\text{C}$  NMR spectrum of **3**.

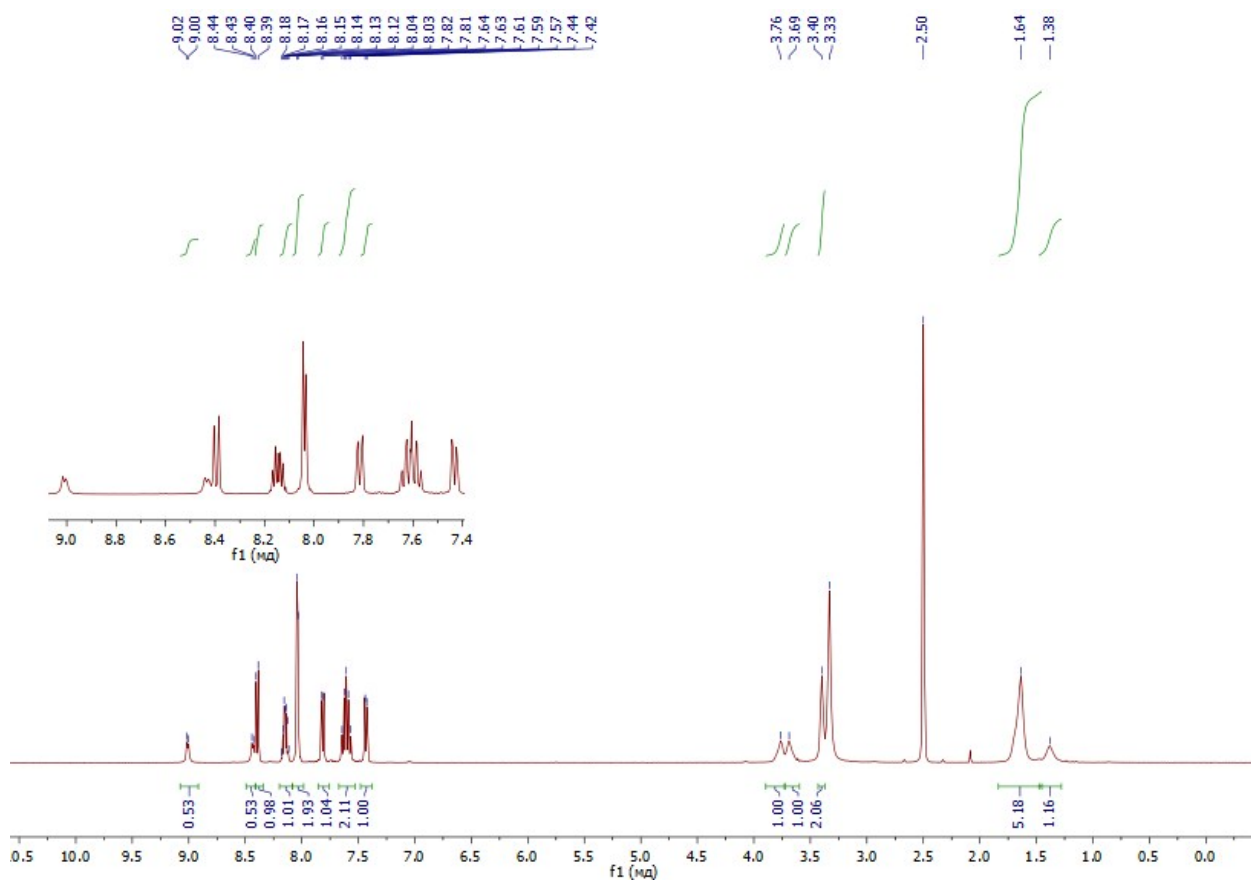

Figure S14.  $^1\text{H}$  NMR spectrum of **4** in  $\text{dms-}d_6$ .

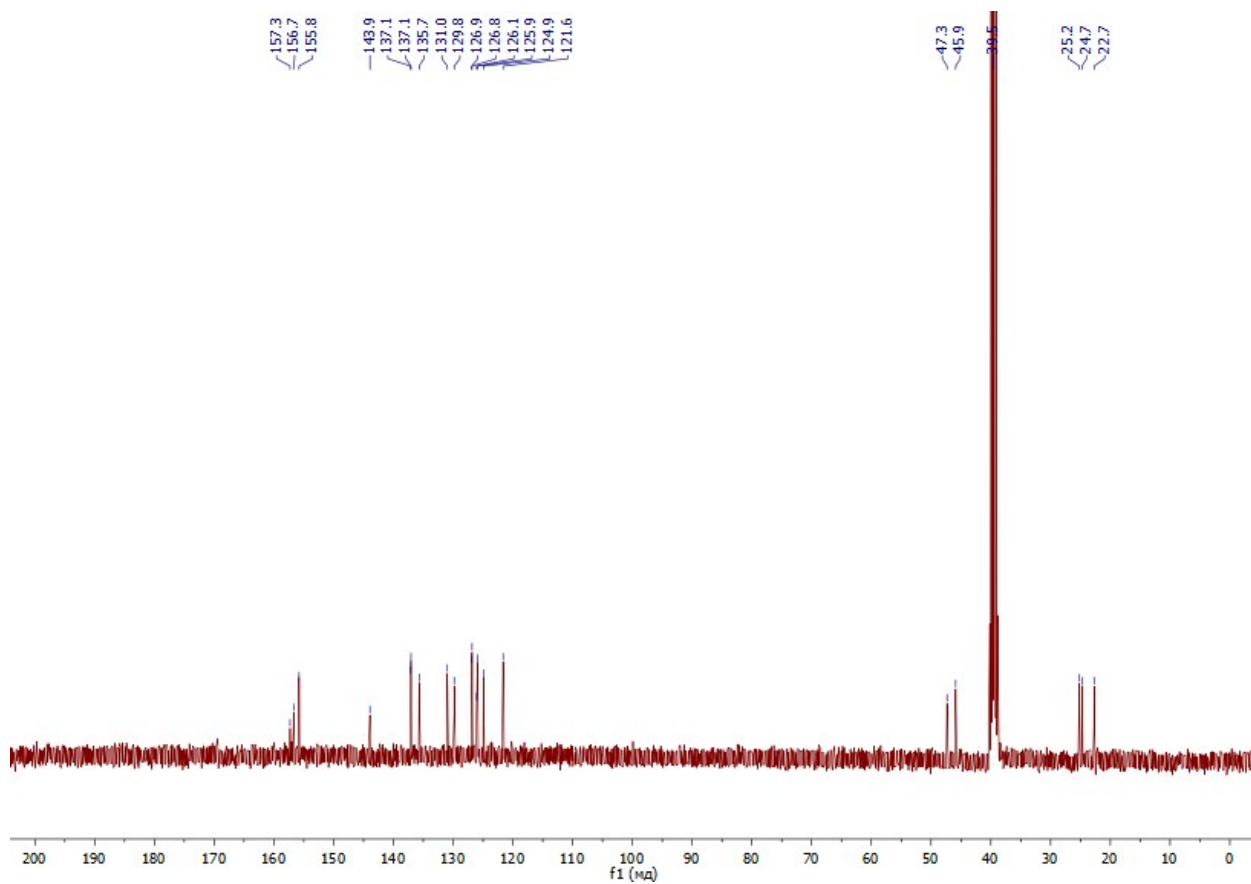

**Figure S15.**  $^{13}\text{C}$  NMR spectrum of **4** in  $\text{dms}\text{-}d_6$ .

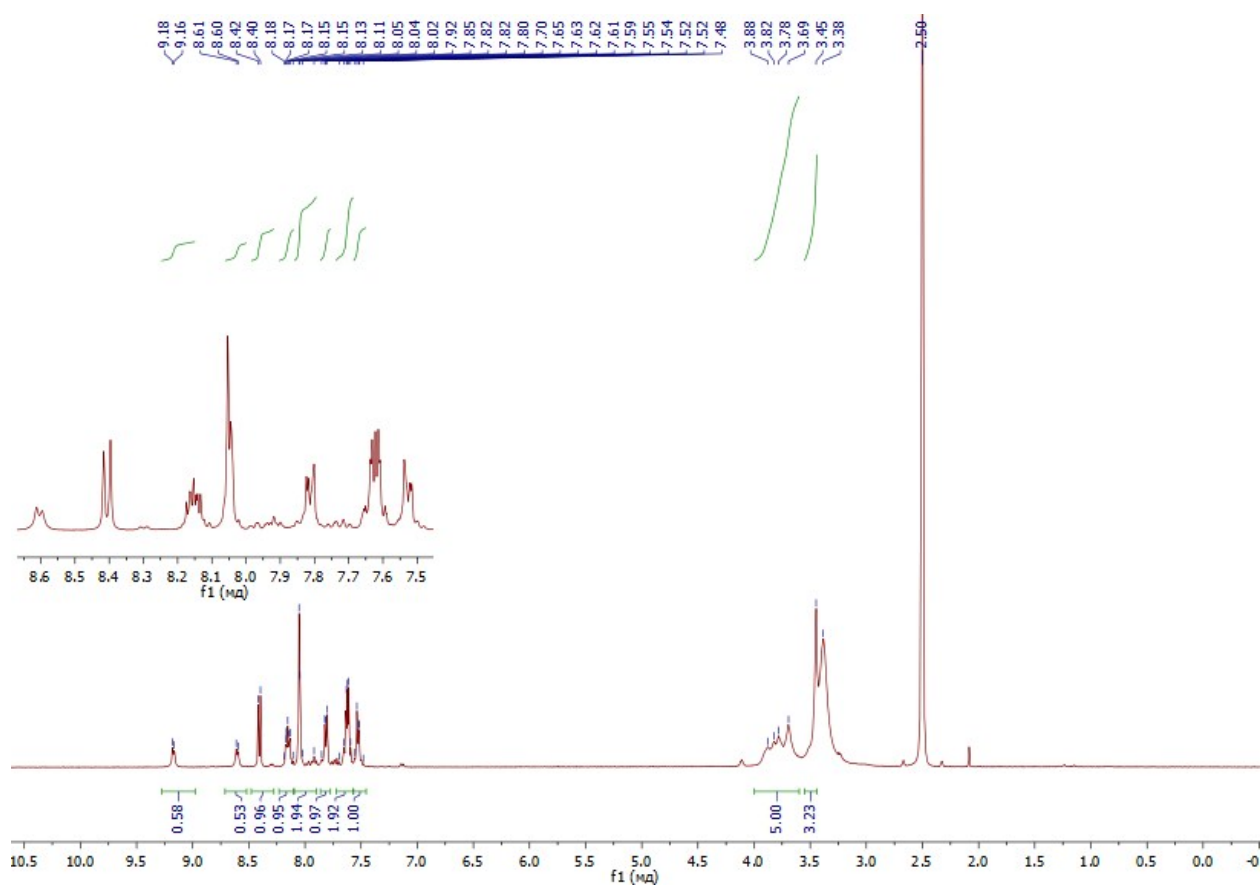

**Figure S16.**  $^1\text{H}$  NMR spectrum of **5** in  $\text{dms}\text{-}d_6$ .

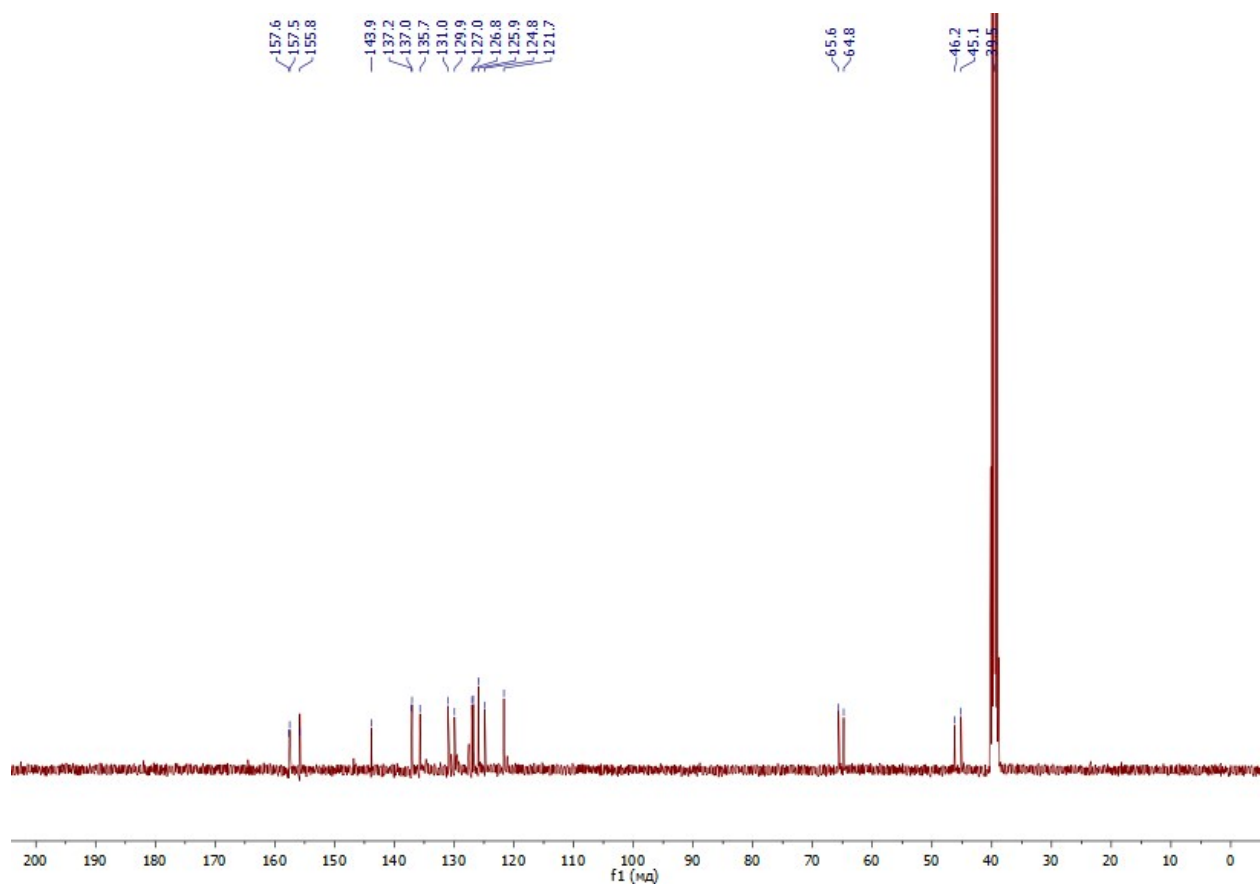

**Figure S17.**  $^{13}\text{C}$  NMR spectrum of **5** in  $\text{dms}\text{-}d_6$ .

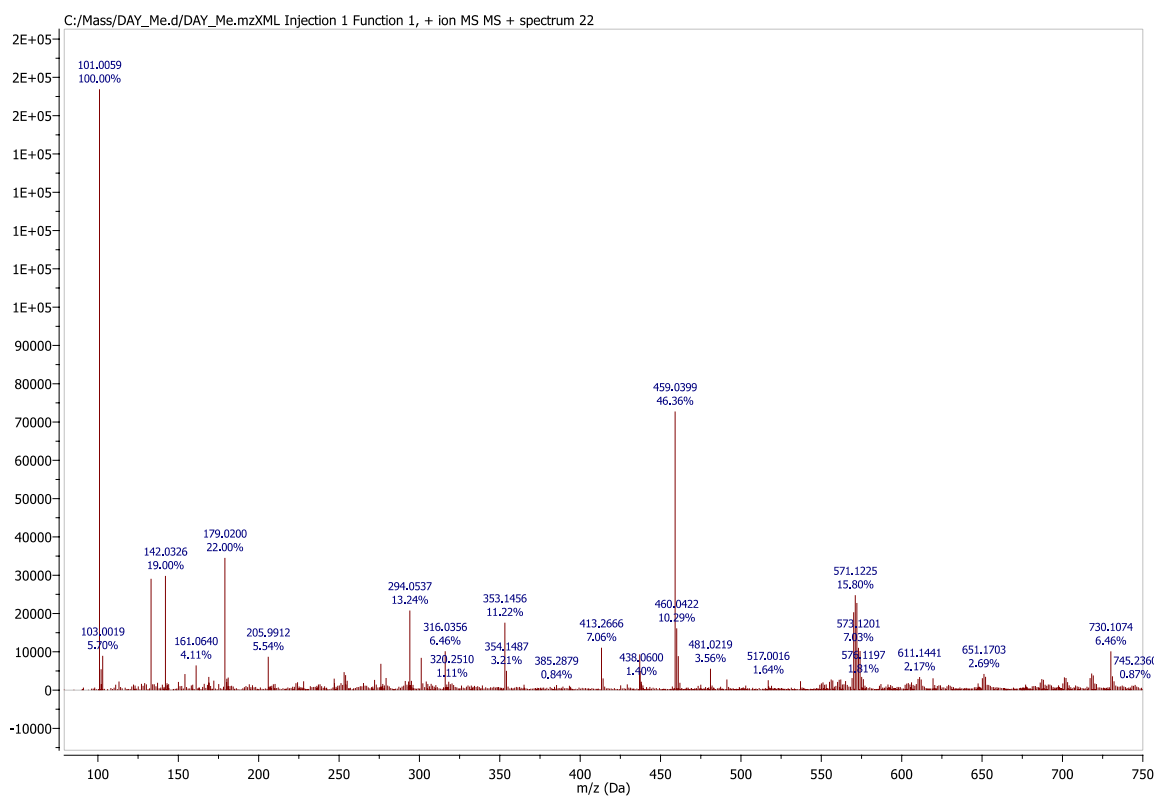

**Figure S18.** HRESI-MS<sup>+</sup> spectrum of **1**.

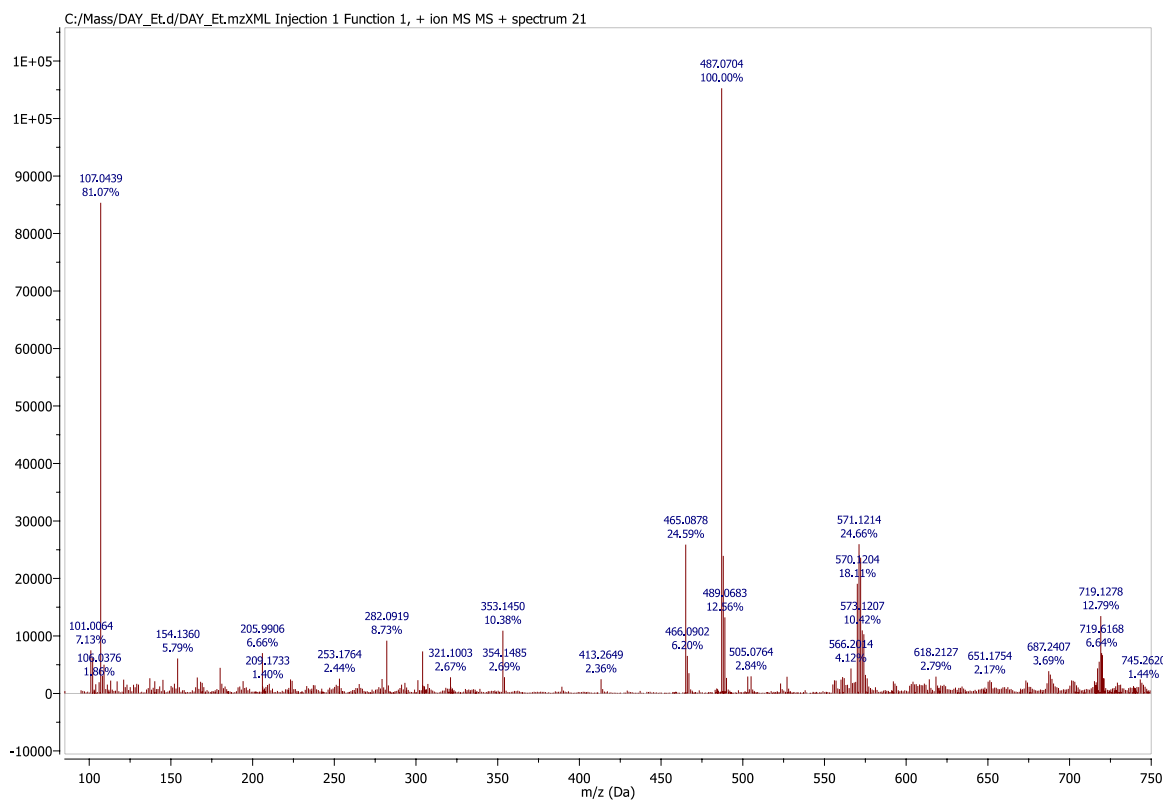

**Figure S19.** HRESI-MS<sup>+</sup> spectrum of **2**.

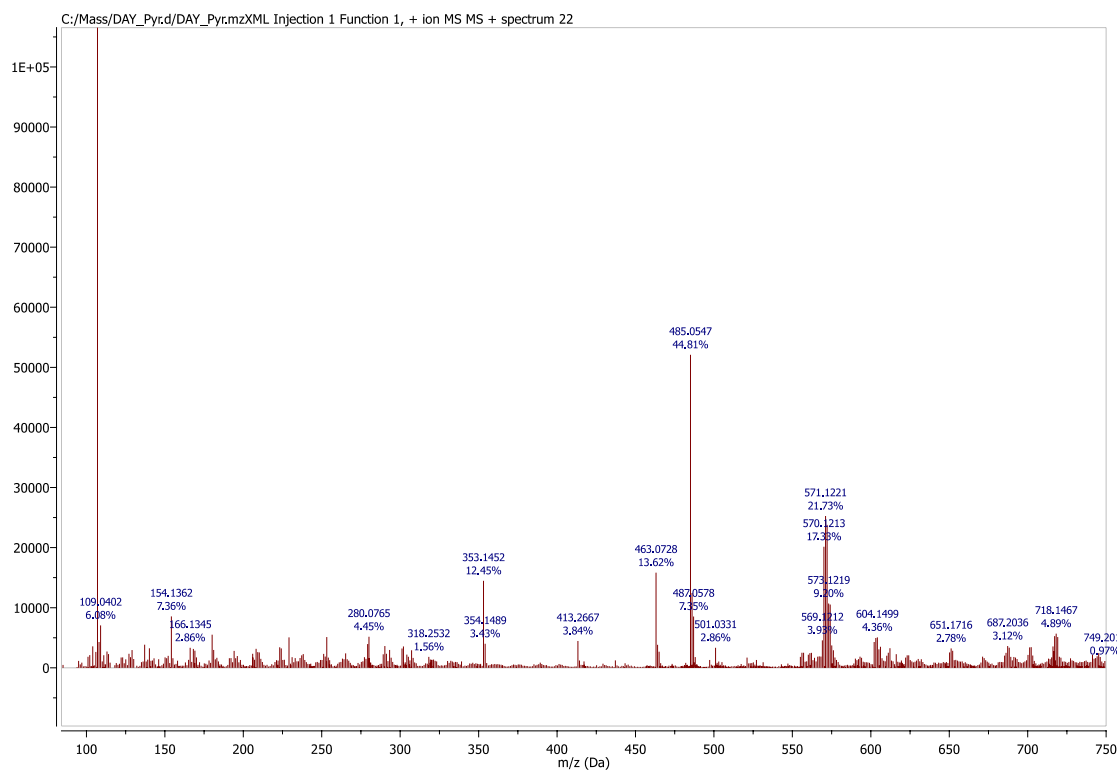

**Figure S20.** HRESI-MS<sup>+</sup> spectrum of **3**.

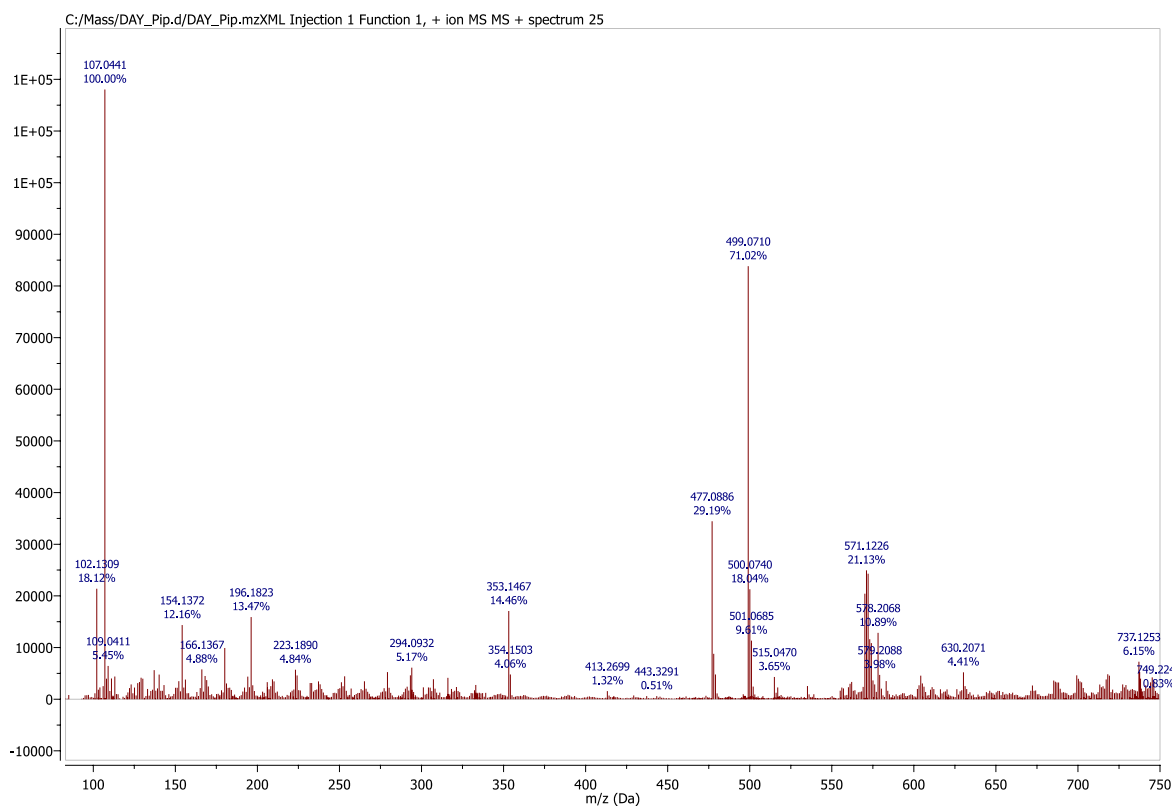

**Figure S21.** HRESI-MS<sup>+</sup> spectrum of **4**.

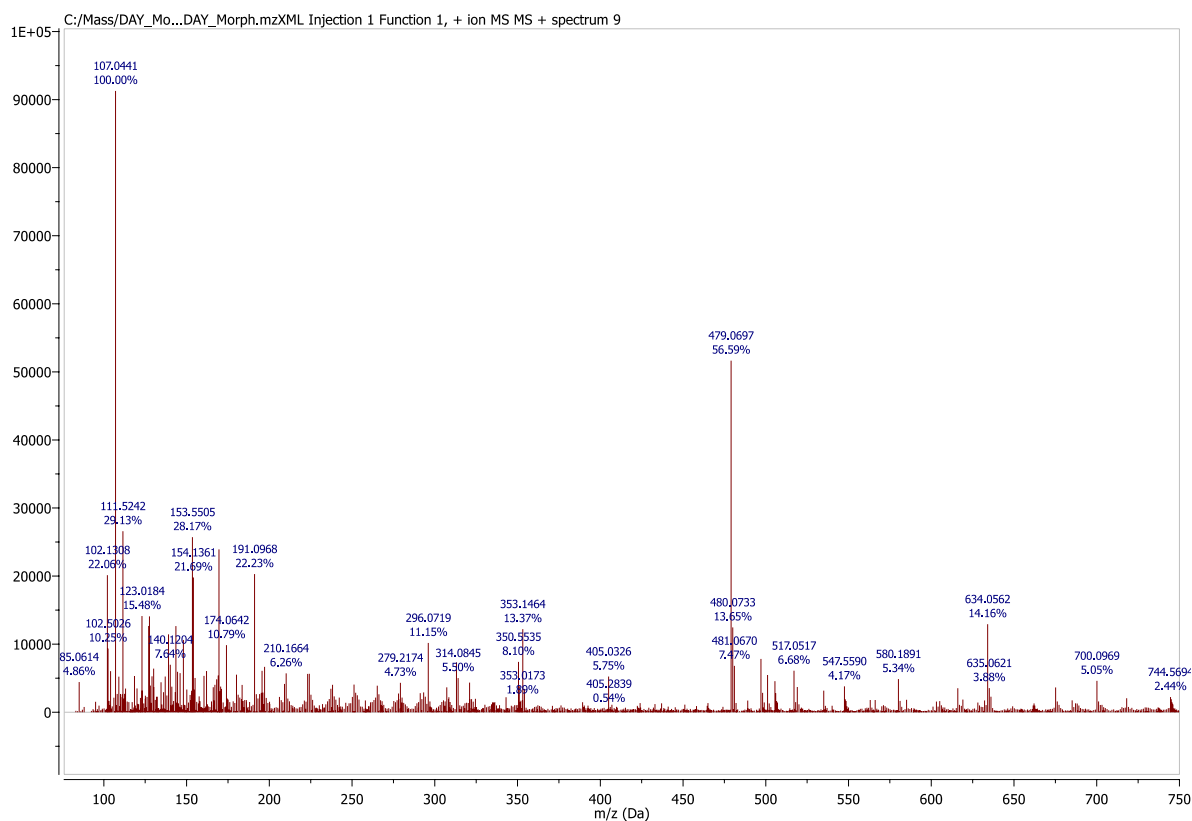

Figure S22. HRESI-MS<sup>+</sup> spectrum of 5.

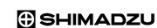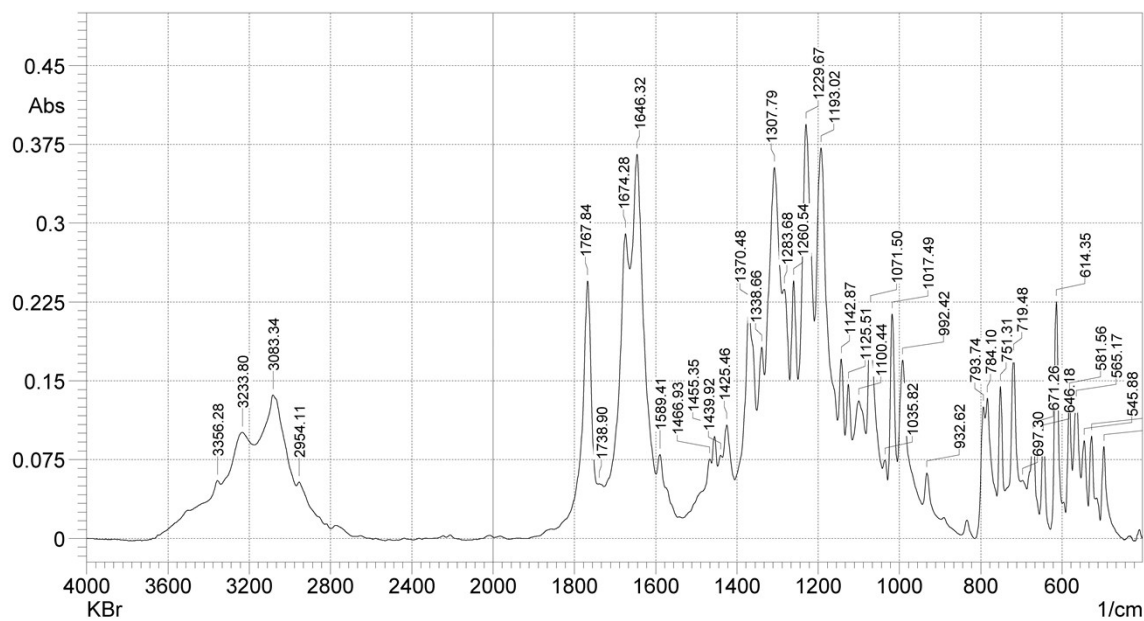

Comment:  
KBr

No. of Scans:  
Resolution;  
Apodization;

Date/Time: 19/02/2019 11:45:36  
Григорьев Я.М.; User

Figure S23. IR spectrum of 1.

SHIMADZU

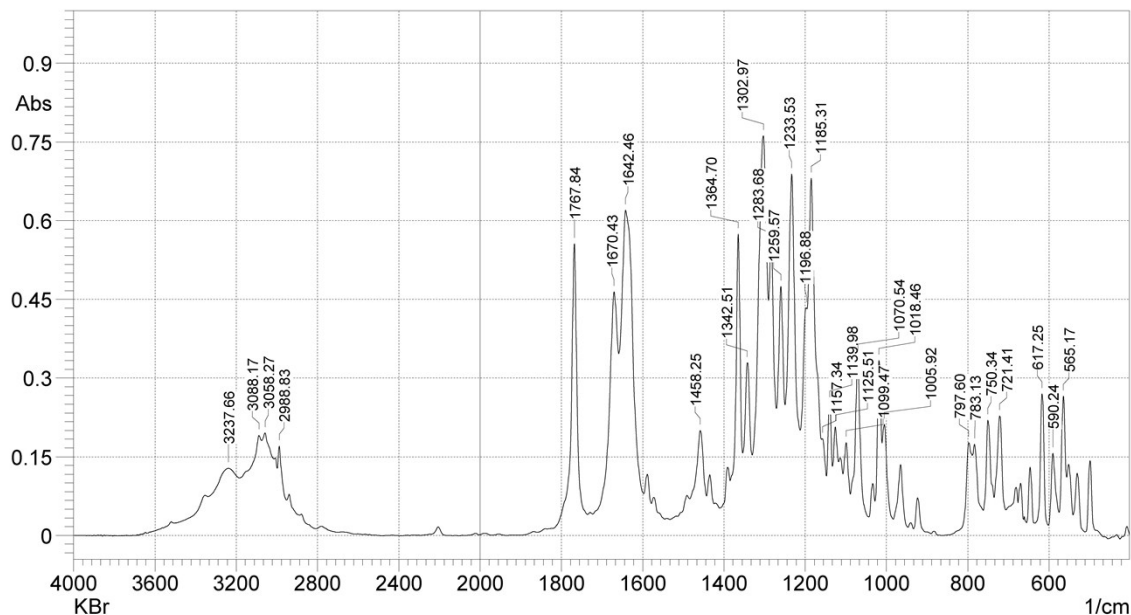

Comment;  
KBr

No. of Scans:  
Resolution;  
Apodization;

Date/Time: 19 02 2019 11:53:14  
Григорьев Я.М.; User

Figure S24. IR spectrum of 2.

SHIMADZU

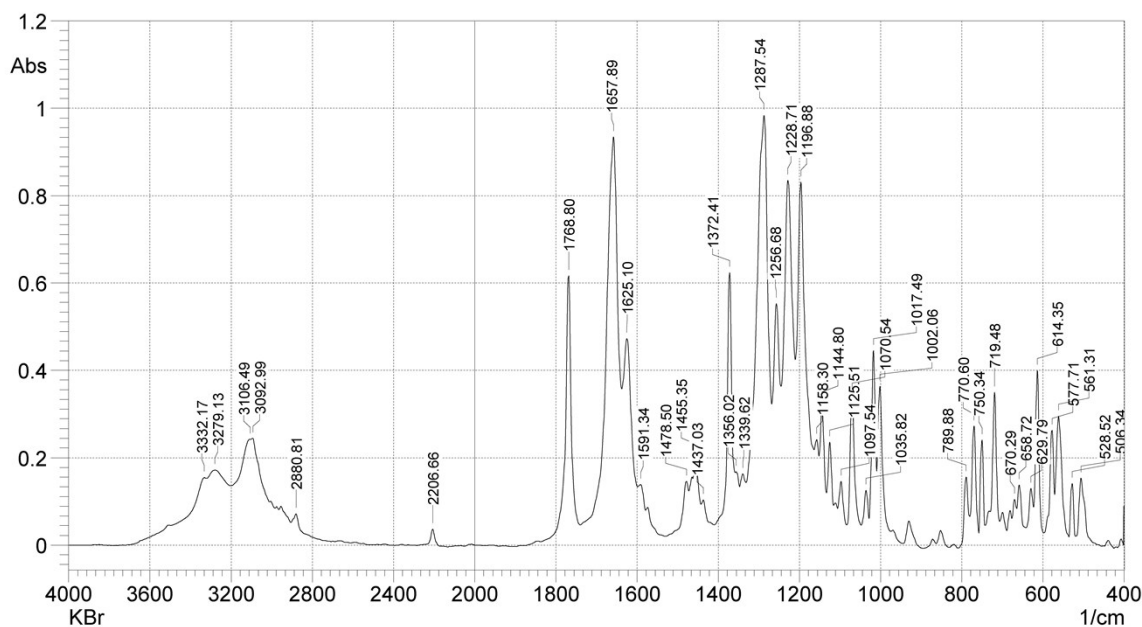

Comment;  
KBr

No. of Scans:  
Resolution;  
Apodization;

Date/Time: 19 02 2019 11:47:45  
Григорьев Я.М.; User

Figure S25. IR spectrum of 3.

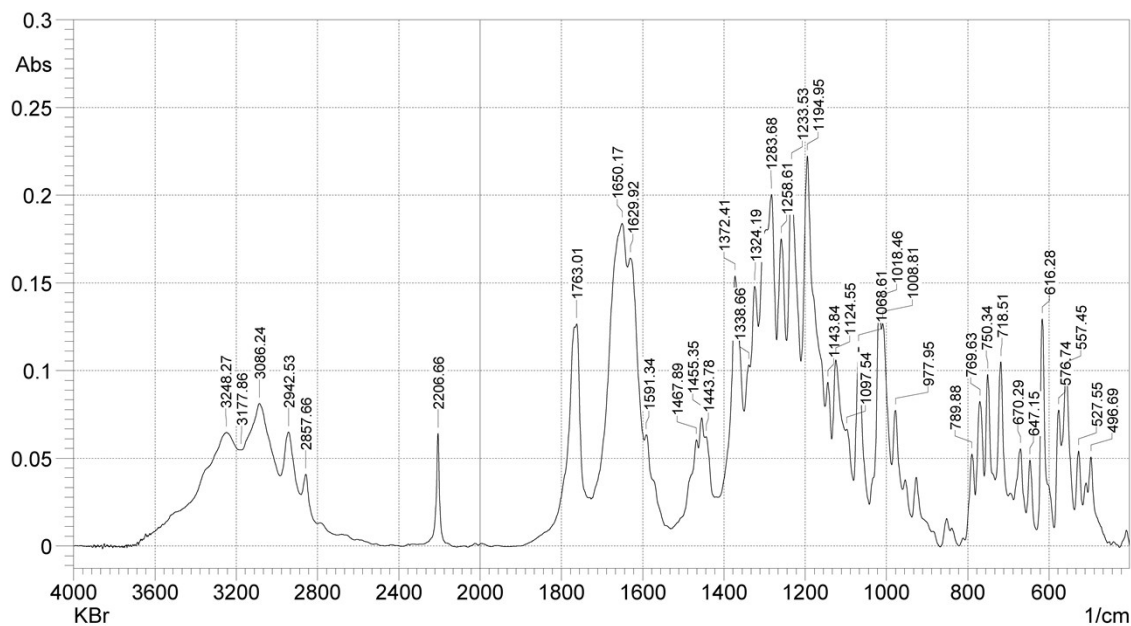

Comment;  
KBr

No. of Scans:  
Resolution;  
Apodization;

Date/Time: 19 02 2019 11:43:28  
Григорьев Я.М.; User

Figure S26. IR spectrum of 4.

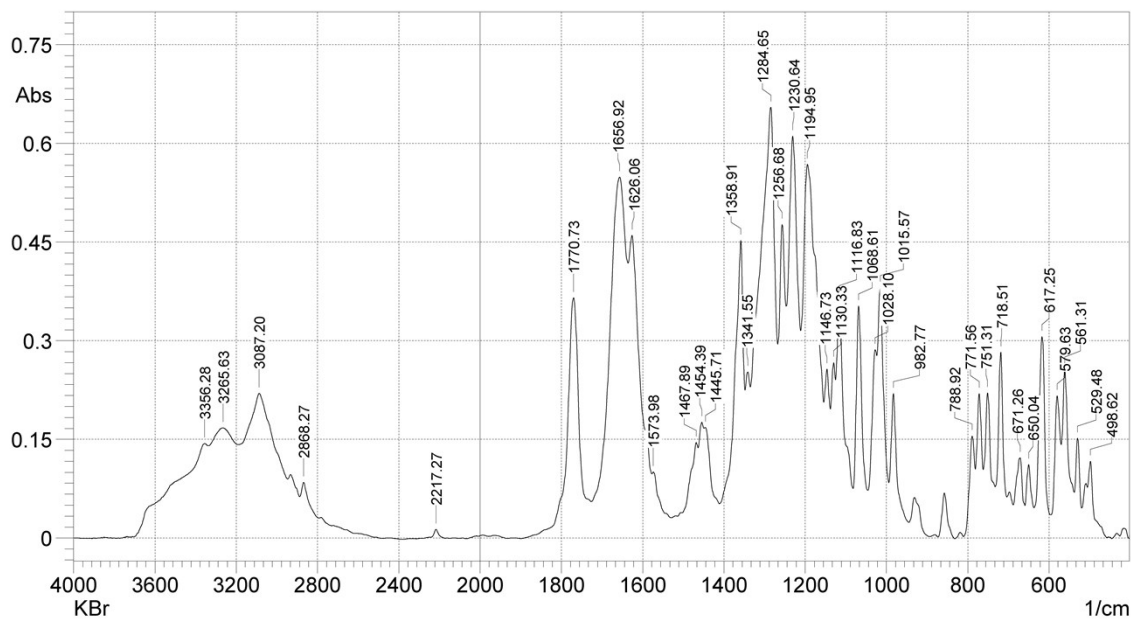

Comment;  
KBr

No. of Scans:  
Resolution;  
Apodization;

Date/Time: 19 02 2019 11:50:39  
Григорьев Я.М.; User

Figure S27. IR spectrum of 5.



1. Dolomanov, O. V.; Bourhis, L. J.; Gildea, R. J.; Howard, J. A. K.; Puschmann, H., OLEX2: a complete structure solution, refinement and analysis program. *Journal of Applied Crystallography* **2009**, *42*, 339-341.
2. Sheldrick, G., SHELXT - Integrated space-group and crystal-structure determination. *Acta Crystallographica Section A* **2015**, *71*, 3-8.
3. Sheldrick, G., Crystal structure refinement with SHELXL. *Acta Crystallographica Section C* **2015**, *71*, 3-8.
4. Bondi, A., VAN DER WAALS VOLUMES + RADII. *J. Phys. Chem.* **1964**, *68*, 441-451.
